# Supplementary material for: Fine-tuning of the spin-crossover properties of Fe(iii) complexes via ligand design
Source: Royal Society of Chemistry journal article supplement (doi:10.1039/d3cp00250k), 2023-01-01
Supplement: d3cp00250k1.xlsx [file d3cp00250k1.xlsx]

## Sheet: Hammett 
[Fe(L1R)(im)2]+
R	sp	sp+	DE	T1/2
H	0	0	7.60447	536
CH3	-0.17	-0.31	7.07505	521
CF3	0.54	0.61	9.61449	641
OMe	-0.268	-0.78	3.31751	283
F	0.062	-0.07	3.90421	308
Cl	0.227	0.11	4.89506	374
Br	0.232	0.15	4.44874	343
NH2	-0.66	-1.3	1.86586	187
CN	0.66	0.66	8.92077	574
[Fe(L2Rm)(im)2]+
R	sm	DE	DH	DS	T1/2
NH2	-0.161	2.62	3.66	14.25	245
CH3	-0.069	2.92	3.99	15.74	243
H	0	2.92	3.95	14.74	256
OMe	0.115	2.58	3.6	14.94	230
F	0.337	3.36	4.37	14.42	291
Cl	0.373	3.32	4.32	14.48	285
Br	0.393	3.32	4.33	14.46	286
CF3	0.43	3.52	4.54	14.76	294
CN	0.56	3.53	4.54	14.38	302
[Fe(L2Rp)(im)2]+
R	sp	DE	DH	DS	T1/2
NH2	-0.66	1.66	2.74	14.85	174
OMe	-0.268	1.58	2.63	14.68	168
CH3	-0.17	2.73	3.81	15.52	234
H	0	2.92	3.95	14.74	256
F	0.062	2.8	3.84	14.79	247
Cl	0.227	2.95	3.98	14.59	260
Br	0.232	3	4.02	14.55	263
CF3	0.54	3.69	4.7	15	301
CN	0.66	3.68	4.68	14.04	320

## Sheet: Swain-Lupton
[Fe(L1R)(im)2]+
R	Swain-Lupton (original)	Swain-Lupton (modified)	DE	T1/2
NH2	-0.681	-0.74	1.86586	187
OMe	-0.5	-0.56	3.31751	283
CH3	-0.141	-0.18	7.07505	521
H	0	0	7.60447	536
F	-0.336	-0.39	3.90421	308
Cl	-0.161	-0.19	4.89506	374
Br	-0.176	-0.22	4.44874	343
CF3	0.186	0.16	9.61449	641
CN	0.184	0.15	8.92077	574
[Fe(L2Rm)(im)2]+
R	Swain-Lupton (original)	Swain-Lupton (modified)	DE	T1/2
NH2	-0.681	-0.74	2.62	245
OMe	-0.5	-0.56	2.58	230
CH3	-0.141	-0.18	2.92	243
H	0	0	2.92	256
F	-0.336	-0.39	3.36	291
Cl	-0.161	-0.19	3.32	285
Br	-0.176	-0.22	3.32	286
CF3	0.186	0.16	3.52	294
CN	0.184	0.15	3.53	302
[Fe(L2Rp)(im)2]+
R	Swain-Lupton (original)	Swain-Lupton (modified)	DE	T1/2
NH2	-0.681	-0.74	1.66	174
OMe	-0.5	-0.56	1.58	168
CH3	-0.141	-0.18	2.73	234
H	0	0	2.92	256
F	-0.336	-0.39	2.8	247
Cl	-0.161	-0.19	2.95	260
Br	-0.176	-0.22	3	263
CF3	0.186	0.16	3.69	301
CN	0.184	0.15	3.68	320

## Sheet: Electronegativity
[Fe(L1R)(im)2]+
R	c	DE	T1/2
NH2	2.42	1.86586	187
OMe	2.44	3.31751	283
CH3	2.28	7.07505	521
H	2.1	7.60447	536
F	4	3.90421	308
Cl	3	4.89506	374
Br	2.8	4.44874	343
CF3	3.49	9.61449	641
CN	2.77	8.92077	574
[Fe(L2Rm)(im)2]+
R	c	DE	T1/2
NH2	2.42	2.6232	245
OMe	2.44	2.5829	230
CH3	2.28	2.9153	243
H	2.1	2.9197	256
F	4	3.3647	291
Cl	3	3.3156	285
Br	2.8	3.32	286
CF3	3.49	3.524	294
CN	2.77	3.5334	302
[Fe(L2Rp)(im)2]+
R	c	DE	T1/2
NH2	2.42	1.66379	174
OMe	2.44	1.58133	168
CH3	2.28	2.73396	234
H	2.1	2.91966	256
F	4	2.80069	247
Cl	3	2.9524	260
Br	2.8	2.99835	263
CF3	3.49	3.69207	301
CN	2.77	3.67696	320

## Sheet: NBO charges
[Fe(L1R)(im)2]+
	R =	q Fe	q O 1	q O 2	q N 1	q N 2		Average O	Average N	Average Coordination Sphere			DE	T1/2
HIGH SPIN	H	1.18	-0.603	-0.61	-0.488	-0.489		-0.6065	-0.4885	-0.5475			7.60447	536
	CH3	1.203	-0.622	-0.629	-0.505	-0.506		-0.6255	-0.5055	-0.5655			7.07505	521
	CF3	1.206	-0.58	-0.586	-0.463	-0.463		-0.583	-0.463	-0.523			9.61449	641
	OMe	1.176	-0.618	-0.624	-0.546	-0.55		-0.621	-0.548	-0.5845			3.31751	283
	F	1.187	-0.602	-0.61	-0.546	-0.55		-0.606	-0.548	-0.577			3.90421	308
	Cl	1.194	-0.589	-0.598	-0.515	-0.517		-0.5935	-0.516	-0.55475			4.89506	374
	Br	1.193	-0.593	-0.602	-0.523	-0.525		-0.5975	-0.524	-0.56075			4.44874	343
	NH2	1.182	-0.649	-0.655	-0.554	-0.56		-0.652	-0.557	-0.6045			1.86586	187
	CN	1.203	-0.567	-0.577	-0.446	-0.442		-0.572	-0.444	-0.508			8.92077	574
	R =	q Fe	q O 1	q O 2	q N 1	q N 2		Average O	Average N	Average Coordination Sphere			DE	T1/2
LOW SPIN	H	0.375	-0.496	-0.499	-0.342	-0.345		-0.4975	-0.3435	-0.4205			7.60447	536
	CH3	0.408	-0.515	-0.519	-0.36	-0.363		-0.517	-0.3615	-0.43925			7.07505	521
	CF3	0.387	-0.465	-0.467	-0.318	-0.322		-0.466	-0.32	-0.393			9.61449	641
	OMe	0.407	-0.521	-0.523	-0.396	-0.401		-0.522	-0.3985	-0.46025			3.31751	283
	F	0.407	-0.509	-0.511	-0.397	-0.401		-0.51	-0.399	-0.4545			3.90421	308
	Cl	0.412	-0.495	-0.497	-0.374	-0.378		-0.496	-0.376	-0.436			4.89506	374
	Br	0.418	-0.5	-0.503	-0.386	-0.391		-0.5015	-0.3885	-0.445			4.44874	343
	NH2	0.431	-0.551	-0.553	-0.408	-0.418		-0.552	-0.413	-0.4825			1.86586	187
	CN	0.377	-0.455	-0.459	-0.295	-0.296		-0.457	-0.2955	-0.37625			8.92077	574
	R =		q O 1	q O 2	q N 1	q N 2		Average O	Average N	Average Coordination Sphere			DE	T1/2
LIGAND	H		-0.659	-0.659	-0.466	-0.466		-0.659	-0.466	-0.5625			7.60447	536
	CH3		-0.658	-0.658	-0.469	-0.469		-0.658	-0.469	-0.5635			7.07505	521
	CF3		-0.597	-0.597	-0.415	-0.415		-0.597	-0.415	-0.506			9.61449	641
	OMe		-0.617	-0.617	-0.492	-0.492		-0.617	-0.492	-0.5545			3.31751	283
	F		-0.603	-0.603	-0.509	-0.509		-0.603	-0.509	-0.556			3.90421	308
	Cl		-0.506	-0.506	-0.432	-0.432		-0.506	-0.432	-0.469			4.89506	374
	Br		-0.49	-0.49	-0.322	-0.322		-0.49	-0.322	-0.406			4.44874	343
	NH2		-0.671	-0.671	-0.515	-0.515		-0.671	-0.515	-0.593			1.86586	187
	CN		-0.573	-0.573	-0.388	-0.386		-0.573	-0.387	-0.48			8.92077	574
[Fe(L2Rm)(im)2]+
	R =	q Fe	q O 1	q O 2	q N 1	q N 2		Average O	Average N	Average Coordination Sphere			DE	T1/2
HIGH SPIN	H	1.183	-0.63	-0.617	-0.467	-0.469		-0.6235	-0.468	-0.54575			2.91966	256
	CH3	1.184	-0.631	-0.617	-0.471	-0.474		-0.624	-0.4725	-0.54825			2.91526	243
	CF3	1.188	-0.626	-0.614	-0.462	-0.463		-0.62	-0.4625	-0.54125			3.52399	294
	OMe	1.182	-0.632	-0.619	-0.477	-0.48		-0.6255	-0.4785	-0.552			2.58288	230
	F	1.187	-0.628	-0.617	-0.471	-0.473		-0.6225	-0.472	-0.54725			3.36473	291
	Cl	1.187	-0.627	-0.615	-0.469	-0.47		-0.621	-0.4695	-0.54525			3.31562	285
	Br	1.187	-0.627	-0.615	-0.468	-0.47		-0.621	-0.469	-0.545			3.32003	286
	NH2	1.182	-0.637	-0.623	-0.485	-0.488		-0.63	-0.4865	-0.55825			2.62316	245
	CN	1.189	-0.625	-0.614	-0.461	-0.461		-0.6195	-0.461	-0.54025			3.53343	302
	R =	q Fe	q O 1	q O 2	q N 1	q N 2		Average O	Average N	Average Coordination Sphere			DE	T1/2
LOW SPIN	H	0.404	-0.518	-0.512	-0.344	-0.338		-0.515	-0.341	-0.428			2.91966	256
	CH3	0.405	-0.519	-0.513	-0.348	-0.342		-0.516	-0.345	-0.4305			2.91526	243
	CF3	0.405	-0.512	-0.507	-0.337	-0.332		-0.5095	-0.3345	-0.422			3.52399	294
	OMe	0.41	-0.524	-0.518	-0.353	-0.347		-0.521	-0.35	-0.4355			2.58288	230
	F	0.408	-0.518	-0.513	-0.345	-0.34		-0.5155	-0.3425	-0.429			3.36473	291
	Cl	0.408	-0.516	-0.511	-0.344	-0.338		-0.5135	-0.341	-0.42725			3.31562	285
	Br	0.408	-0.515	-0.51	-0.343	-0.337		-0.5125	-0.34	-0.42625			3.32003	286
	NH2	0.412	-0.529	-0.523	-0.36	-0.353		-0.526	-0.3565	-0.44125			2.62316	245
	CN	0.407	-0.512	-0.507	-0.335	-0.33		-0.5095	-0.3325	-0.421			3.53343	302
	R =		q O 1	q O 2	q N 1	q N 2		Average O	Average N	Average Coordination Sphere			DE	T1/2
LIGAND	H		-0.716	-0.716	-0.454	-0.454		-0.716	-0.454	-0.585			2.91966	256
	CH3		-0.713	-0.713	-0.456	-0.456		-0.713	-0.456	-0.5845			2.91526	243
	CF3		-0.698	-0.698	-0.442	-0.442		-0.698	-0.442	-0.57			3.52399	294
	OMe		-0.712	-0.712	-0.456	-0.456		-0.712	-0.456	-0.584			2.58288	230
	F		-0.704	-0.704	-0.454	-0.454		-0.704	-0.454	-0.579			3.36473	291
	Cl		-0.695	-0.695	-0.45	-0.45		-0.695	-0.45	-0.5725			3.31562	285
	Br		-0.687	-0.687	-0.448	-0.448		-0.687	-0.448	-0.5675			3.32003	286
	NH2		-0.671	-0.671	-0.399	-0.399		-0.671	-0.399	-0.535			2.62316	245
	CN		-0.693	-0.693	-0.438	-0.438		-0.693	-0.438	-0.5655			3.53343	302
[Fe(L2Rp)(im)2]+
	R =	q Fe	q O 1	q O 2	q N 1	q N 2		Average O	Average N	Average Coordination Sphere			DE	T1/2
HIGH SPIN	H	1.183	-0.63	-0.617	-0.467	-0.469		-0.6235	-0.468	-0.54575			2.91966	256
	CH3	1.181	-0.631	-0.617	-0.468	-0.47		-0.624	-0.469	-0.5465			2.73396	234
	CF3	1.19	-0.626	-0.614	-0.464	-0.465		-0.62	-0.4645	-0.54225			3.69207	301
	OMe	1.169	-0.633	-0.617	-0.462	-0.464		-0.625	-0.463	-0.544			1.58133	168
	F	1.18	-0.629	-0.616	-0.463	-0.464		-0.6225	-0.4635	-0.543			2.80069	247
	Cl	1.183	-0.628	-0.615	-0.463	-0.465		-0.6215	-0.464	-0.54275			2.9524	260
	Br	1.183	-0.628	-0.615	-0.463	-0.465		-0.6215	-0.464	-0.54275			2.99835	263
	NH2	1.165	-0.634	-0.616	-0.464	-0.466		-0.625	-0.465	-0.545			1.66379	174
	CN	1.19	-0.623	-0.612	-0.462	-0.463		-0.6175	-0.4625	-0.54			3.67696	320
	R =	q Fe	q O 1	q O 2	q N 1	q N 2		Average O	Average N	Average Coordination Sphere			DE	T1/2
LOW SPIN	H	0.404	-0.518	-0.512	-0.344	-0.338		-0.515	-0.341	-0.428			2.91966	256
	CH3	0.4	-0.517	-0.511	-0.345	-0.339		-0.514	-0.342	-0.428			2.73396	234
	CF3	0.409	-0.513	-0.507	-0.339	-0.334		-0.51	-0.3365	-0.42325			3.69207	301
	OMe	0.392	-0.52	-0.512	-0.34	-0.335		-0.516	-0.3375	-0.42675			1.58133	168
	F	0.399	-0.516	-0.51	-0.339	-0.334		-0.513	-0.3365	-0.42475			2.80069	247
	Cl	0.401	-0.515	-0.509	-0.339	-0.334		-0.512	-0.3365	-0.42425			2.9524	260
	Br	0.402	-0.515	-0.509	-0.339	-0.334		-0.512	-0.3365	-0.42425			2.99835	263
	NH2	0.381	-0.517	-0.509	-0.341	-0.335		-0.513	-0.338	-0.4255			1.66379	174
	CN	0.409	-0.513	-0.507	-0.335	-0.331		-0.51	-0.333	-0.4215			3.67696	320
	R =		q O 1	q O 2	q N 1	q N 2		Average O	Average N	Average Coordination Sphere			DE	T1/2
LIGAND	H		-0.716	-0.716	-0.454	-0.454		-0.716	-0.454	-0.585			2.91966	256
	CH3		-0.716	-0.716	-0.456	-0.456		-0.716	-0.456	-0.586			2.73396	234
	CF3		-0.686	-0.686	-0.438	-0.438		-0.686	-0.438	-0.562			3.69207	301
	OMe		-0.723	-0.723	-0.451	-0.451		-0.723	-0.451	-0.587			1.58133	168
	F		-0.717	-0.717	-0.454	-0.454		-0.717	-0.454	-0.5855			2.80069	247
	Cl		-0.706	-0.706	-0.446	-0.446		-0.706	-0.446	-0.576			2.9524	260
	Br		-0.703	-0.703	-0.445	-0.445		-0.703	-0.445	-0.574			2.99835	263
	NH2		-0.719	-0.719	-0.461	-0.46		-0.719	-0.4605	-0.58975			1.66379	174
	CN		-0.674	-0.674	-0.432	-0.432		-0.674	-0.432	-0.553			3.67696	320

## Sheet: Mulliken charges
[Fe(L1R)(im)2]+
	R =	q Fe	q O 1	q O 2	q N 1	q N 2		Average O	Average N	Average Coordination Sphere			DE	T1/2
HIGH SPIN	H	0.497	-0.416	-0.423	-0.128	-0.135		-0.4195	-0.1315	-0.288			7.60447	536
	CH3	0.543	-0.449	-0.456	-0.141	-0.147		-0.4525	-0.144	-0.3085			7.07505	521
	CF3	0.503	-0.428	-0.435	-0.138	-0.142		-0.4315	-0.14	-0.2915			9.61449	641
	OMe	0.519	-0.422	-0.431	-0.177	-0.184		-0.4265	-0.1805	-0.246			3.31751	283
	F	0.48	-0.373	-0.383	-0.163	-0.163		-0.378	-0.163	-0.215			3.90421	308
	Cl	0.474	-0.379	-0.391	-0.149	-0.14		-0.385	-0.1445	-0.2405			4.89506	374
	Br	0.474	-0.379	-0.39	-0.155	-0.144		-0.3845	-0.1495	-0.235			4.44874	343
	NH2	0.541	-0.477	-0.482	-0.191	-0.206		-0.4795	-0.1985	-0.281			1.86586	187
	CN	0.514	-0.428	-0.443	-0.152	-0.138		-0.4355	-0.145	-0.2905			8.92077	574
	R =	q Fe	q O 1	q O 2	q N 1	q N 2		Average O	Average N	Average Coordination Sphere			DE	T1/2
LOW SPIN	H	-0.012	-0.358	-0.365	-0.022	-0.034		-0.3615	-0.028	-0.3335			7.60447	536
	CH3	-0.009	-0.384	-0.392	-0.032	-0.045		-0.388	-0.0385	-0.3495			7.07505	521
	CF3	-0.076	-0.349	-0.354	-0.014	-0.026		-0.3515	-0.02	-0.3315			9.61449	641
	OMe	-0.009	-0.368	-0.373	-0.072	-0.087		-0.3705	-0.0795	-0.291			3.31751	283
	F	-0.033	-0.329	-0.333	-0.053	-0.064		-0.331	-0.0585	-0.2725			3.90421	308
	Cl	-0.054	-0.326	-0.331	-0.036	-0.049		-0.3285	-0.0425	-0.286			4.89506	374
	Br	-0.048	-0.325	-0.33	-0.039	-0.051		-0.3275	-0.045	-0.2825			4.44874	343
	NH2	-0.017	-0.425	-0.431	-0.094	-0.114		-0.428	-0.104	-0.324			1.86586	187
	CN	-0.033	-0.356	-0.363	-0.024	-0.031		-0.3595	-0.0275	-0.332			8.92077	574
	R =		q O 1	q O 2	q N 1	q N 2		Average O	Average N	Average Coordination Sphere			DE	T1/2
LIGAND	H		-0.42	-0.42	-0.176	-0.176		-0.42	-0.176	-0.298			7.60447	536
	CH3		-0.426	-0.426	-0.144	-0.144		-0.426	-0.144	-0.285			7.07505	521
	CF3		-0.381	-0.381	-0.162	-0.162		-0.381	-0.162	-0.2715			9.61449	641
	OMe		-0.348	-0.348	-0.212	-0.212		-0.348	-0.212	-0.28			3.31751	283
	F		-0.325	-0.325	-0.209	-0.209		-0.325	-0.209	-0.267			3.90421	308
	Cl		-0.229	-0.229	-0.131	-0.131		-0.229	-0.131	-0.18			4.89506	374
	Br		-0.218	-0.218	0.021	0.021		-0.218	0.021	-0.0985			4.44874	343
	NH2		-0.426	-0.426	-0.208	-0.208		-0.426	-0.208	-0.317			1.86586	187
	CN		-0.372	-0.372	-0.169	-0.169		-0.372	-0.169	-0.2705			8.92077	574
[Fe(L2Rm)(im)2]+
	R =	q Fe	q O 1	q O 2	q N 1	q N 2		Average O	Average N	Average Coordination Sphere			DE	T1/2
HIGH SPIN	H	0.577	-0.493	-0.508	-0.136	-0.143		-0.5005	-0.1395	-0.361			2.91966	256
	CH3	0.576	-0.495	-0.511	-0.137	-0.144		-0.503	-0.1405	-0.3625			2.91526	243
	CF3	0.575	-0.498	-0.511	-0.131	-0.14		-0.5045	-0.1355	-0.369			3.52399	294
	OMe	0.574	-0.498	-0.512	-0.138	-0.147		-0.505	-0.1425	-0.3625			2.58288	230
	F	0.57	-0.494	-0.507	-0.135	-0.144		-0.5005	-0.1395	-0.361			3.36473	291
	Cl	0.571	-0.494	-0.507	-0.134	-0.144		-0.5005	-0.139	-0.3615			3.31562	285
	Br	0.571	-0.495	-0.508	-0.134	-0.143		-0.5015	-0.1385	-0.363			3.32003	286
	NH2	0.567	-0.497	-0.512	-0.142	-0.148		-0.5045	-0.145	-0.3595			2.62316	245
	CN	0.575	-0.499	-0.51	-0.13	-0.14		-0.5045	-0.135	-0.3695			3.53343	302
	R =	q Fe	q O 1	q O 2	q N 1	q N 2		Average O	Average N	Average Coordination Sphere			DE	T1/2
LOW SPIN	H	-0.025	-0.429	-0.438	0.004	-0.015		-0.4335	-0.0055	-0.428			2.91966	256
	CH3	-0.028	-0.431	-0.441	0.002	-0.018		-0.436	-0.008	-0.428			2.91526	243
	CF3	-0.027	-0.426	-0.434	0.007	-0.011		-0.43	-0.002	-0.428			3.52399	294
	OMe	-0.019	-0.437	-0.446	-0.003	-0.023		-0.4415	-0.013	-0.4285			2.58288	230
	F	-0.024	-0.428	-0.437	0.002	-0.017		-0.4325	-0.0075	-0.425			3.36473	291
	Cl	-0.025	-0.428	-0.436	0.003	-0.016		-0.432	-0.0065	-0.4255			3.31562	285
	Br	-0.025	-0.428	-0.436	0.004	-0.016		-0.432	-0.006	-0.426			3.32003	286
	NH2	-0.027	-0.44	-0.449	-0.004	-0.028		-0.4445	-0.016	-0.4285			2.62316	245
	CN	-0.023	-0.425	-0.434	0.007	-0.009		-0.4295	-0.001	-0.4285			3.53343	302
	R =		q O 1	q O 2	q N 1	q N 2		Average O	Average N	Average Coordination Sphere			DE	T1/2
LIGAND	H		-0.49	-0.49	-0.195	-0.195		-0.49	-0.195	-0.3425			2.91966	256
	CH3		-0.487	-0.487	-0.194	-0.194		-0.487	-0.194	-0.3405			2.91526	243
	CF3		-0.471	-0.471	-0.192	-0.192		-0.471	-0.192	-0.3315			3.52399	294
	OMe		-0.485	-0.485	-0.195	-0.195		-0.485	-0.195	-0.34			2.58288	230
	F		-0.48	-0.48	-0.195	-0.195		-0.48	-0.195	-0.3375			3.36473	291
	Cl		-0.47	-0.47	-0.194	-0.194		-0.47	-0.194	-0.332			3.31562	285
	Br		-0.464	-0.464	-0.193	-0.193		-0.464	-0.193	-0.3285			3.32003	286
	NH2		-0.436	-0.436	-0.149	-0.15		-0.436	-0.1495	-0.29275			2.62316	245
	CN		-0.466	-0.467	-0.192	-0.192		-0.4665	-0.192	-0.32925			3.53343	302
[Fe(L2Rp)(im)2]+
	R =	q Fe	q O 1	q O 2	q N 1	q N 2		Average O	Average N	Average Coordination Sphere			DE	T1/2
HIGH SPIN	H	0.577	-0.493	-0.508	-0.136	-0.143		-0.5005	-0.1395	-0.361			2.91966	256
	CH3	0.581	-0.497	-0.513	-0.139	-0.146		-0.505	-0.1425	-0.3625			2.73396	234
	CF3	0.572	-0.496	-0.508	-0.132	-0.14		-0.502	-0.136	-0.366			3.69207	301
	OMe	0.592	-0.5	-0.517	-0.14	-0.146		-0.5085	-0.143	-0.3655			1.58133	168
	F	0.583	-0.498	-0.512	-0.136	-0.144		-0.505	-0.14	-0.365			2.80069	247
	Cl	0.579	-0.497	-0.511	-0.135	-0.143		-0.504	-0.139	-0.365			2.9524	260
	Br	0.579	-0.497	-0.511	-0.135	-0.143		-0.504	-0.139	-0.365			2.99835	263
	NH2	0.594	-0.499	-0.519	-0.144	-0.147		-0.509	-0.1455	-0.3635			1.66379	174
	CN	0.512	-0.493	-0.505	-0.131	-0.139		-0.499	-0.135	-0.364			3.67696	320
	R =	q Fe	q O 1	q O 2	q N 1	q N 2		Average O		Average Coordination Sphere			DE	T1/2
LOW SPIN	H	-0.025	-0.429	-0.438	0.004	-0.015		-0.4335		-0.428			2.91966	256
	CH3	-0.028	-0.432	-0.441	0.002	-0.017		-0.4365		-0.429			2.73396	234
	CF3	-0.026	-0.424	-0.434	0.006	-0.01		-0.429		-0.427			3.69207	301
	OMe	-0.03	-0.438	-0.449	0.004	-0.014		-0.4435		-0.4385			1.58133	168
	F	-0.028	-0.43	-0.44	0.004	-0.013		-0.435		-0.4305			2.80069	247
	Cl	-0.028	-0.428	-0.438	0.005	-0.013		-0.433		-0.429			2.9524	260
	Br	-0.027	-0.428	-0.438	0.005	-0.013		-0.433		-0.429			2.99835	263
	NH2	-0.035	-0.434	-0.444	0.004	-0.017		-0.439		-0.4325			1.66379	174
	CN	-0.025	-0.42	-0.43	0.008	-0.007		-0.425		-0.4255			3.67696	320
	R =		q O 1	q O 2	q N 1	q N 2		Average O	Average N	Average Coordination Sphere			DE	T1/2
LIGAND	H		-0.49	-0.49	-0.195	-0.195		-0.49	-0.195	-0.3425			2.91966	256
	CH3		-0.491	-0.491	-0.195	-0.195		-0.491	-0.195	-0.343			2.73396	234
	CF3		-0.458	-0.458	-0.193	-0.193		-0.458	-0.193	-0.3255			3.69207	301
	OMe		-0.498	-0.498	-0.193	-0.193		-0.498	-0.193	-0.3455			1.58133	168
	F		-0.492	-0.492	-0.197	-0.197		-0.492	-0.197	-0.3445			2.80069	247
	Cl		-0.48	-0.48	-0.195	-0.195		-0.48	-0.195	-0.3375			2.9524	260
	Br		-0.477	-0.477	-0.194	-0.194		-0.477	-0.194	-0.3355			2.99835	263
	NH2		-0.495	-0.495	-0.199	-0.199		-0.495	-0.199	-0.347			1.66379	174
	CN		-0.447	-0.447	-0.19	-0.19		-0.447	-0.19	-0.3185			3.67696	320

## Sheet: HOMO
[Fe(L1R)(im)2]+
	R =	E HOMO alpha	E HOMO beta		DE	T1/2
HIGH SPIN	H	-0.30762	-0.30702		7.60447	536
	CH3	-0.29326	-0.29233		7.07505	521
	CF3	-0.33295	-0.34096		9.61449	641
	OMe	-0.28621	-0.28743		3.31751	283
	F	-0.32812	-0.32778		3.90421	308
	Cl	-0.32454	-0.32321		4.89506	374
	Br	-0.32429	-0.32273		4.44874	343
	NH2	-0.27142	-0.27045		1.86586	187
	CN	-0.35246	-0.35232		8.92077	574
	R =	E HOMO alpha	E HOMO beta		DE	T1/2
LOW SPIN	H	-0.29778	-0.30547		7.60447	536
	CH3	-0.28415	-0.29121		7.07505	521
	CF3	-0.33295	-0.34096		9.61449	641
	OMe	-0.27904	-0.28255		3.31751	283
	F	-0.32073	-0.32535		3.90421	308
	Cl	-0.31725	-0.32181		4.89506	374
	Br	-0.31734	-0.32128		4.44874	343
	NH2	-0.26705	-0.26892		1.86586	187
	CN	-0.34591	-0.35278		8.92077	574
	R =	E HOMO			DE	T1/2
LIGAND	H	0.09605			7.60447	536
	CH3	0.09397			7.07505	521
	CF3	0.04618			9.61449	641
	OMe	0.08068			3.31751	283
	F	0.06707			3.90421	308
	Cl	0.02183			4.89506	374
	Br	0.0243			4.44874	343
	NH2	0.09971			1.86586	187
	CN	0.02643			8.92077	574
[Fe(L2Rm)(im)2]+
	R =	E HOMO alpha	E HOMO beta		DE	T1/2
HIGH SPIN	H	-0.2838	-0.28488		2.91966	256
	CH3	-0.27914	-0.27994		2.91526	243
	CF3	-0.29911	-0.30033		3.52399	294
	OMe	-0.27724	-0.27845		2.58288	230
	F	-0.29259	-0.29379		3.36473	291
	Cl	-0.29216	-0.29321		3.31562	285
	Br	-0.29231	-0.2933		3.32003	286
	NH2	-0.26699	-0.2672		2.62316	245
	CN	-0.30583	-0.30723		3.53343	302
	R =	E HOMO alpha	E HOMO beta		DE	T1/2
LOW SPIN	H	-0.27652	-0.27867		2.91966	256
	CH3	-0.2719	-0.27466		2.91526	243
	CF3	-0.29208	-0.29442		3.52399	294
	OMe	-0.27051	-0.273		2.58288	230
	F	-0.28559	-0.28874		3.36473	291
	Cl	-0.28532	-0.28831		3.31562	285
	Br	-0.28564	-0.28863		3.32003	286
	NH2	-0.26275	-0.26655		2.62316	245
	CN	-0.29901	-0.30134		3.53343	302
	R =	E HOMO			DE	T1/2
LIGAND	H	0.06117			2.91966	256
	CH3	0.05974			2.91526	243
	CF3	0.03771			3.52399	294
	OMe	0.05626			2.58288	230
	F	0.05025			3.36473	291
	Cl	0.04304			3.31562	285
	Br	0.03858			3.32003	286
	NH2	0.0703			2.62316	245
	CN	0.02894			3.53343	302
[Fe(L2Rp)(im)2]+
	R =	E HOMO alpha	E HOMO beta		DE	T1/2
HIGH SPIN	H	-0.2838	-0.28488		2.91966	256
	CH3	-0.2751	-0.27584		2.73396	234
	CF3	-0.30198	-0.30339		3.69207	301
	OMe	-0.26016	-0.26084		1.58133	168
	F	-0.28483	-0.28555		2.80069	247
	Cl	-0.2844	-0.28519		2.9524	260
	Br	-0.28403	-0.28488		2.99835	263
	NH2	-0.24951	-0.24962		1.66379	174
	CN	-0.30448	-0.30544		3.67696	320
	R =	E HOMO alpha	E HOMO beta		DE	T1/2
LOW SPIN	H	-0.27652	-0.27867		2.91966	256
	CH3	-0.26829	-0.27047		2.73396	234
	CF3	-0.2952	-0.29779		3.69207	301
	OMe	-0.25452	-0.25512		1.58133	168
	F	-0.27798	-0.27995		2.80069	247
	Cl	-0.2783	-0.28016		2.9524	260
	Br	-0.27834	-0.28014		2.99835	263
	NH2	-0.24465	-0.24521		1.66379	174
	CN	-0.29834	-0.30043		3.67696	320
	R =	E HOMO			DE	T1/2
LIGAND	H	0.06117			2.91966	256
	CH3	0.0617			2.73396	234
	CF3	0.03184			3.69207	301
	OMe	0.06611			1.58133	168
	F	0.05793			2.80069	247
	Cl	0.04894			2.9524	260
	Br	0.04509			2.99835	263
	NH2	0.06432			1.66379	174
	CN	0.02481			3.67696	320
