# Supplementary material for: Fine-tuning of the spin-crossover properties of Fe(iii) complexes via ligand design
Source: Royal Society of Chemistry journal article supplement (doi:10.1039/d3cp00250k), 2023-01-01
Supplement: d3cp00250k2.pdf [file d3cp00250k2.pdf]

# Fine-Tuning of the Spin-Crossover properties on Fe(III)

## Complexes via Ligand design

### Supporting Information

*Daniel Vidal<sup>[1,2]</sup>, Jordi Cirera<sup>[1]</sup>\* and Jordi Ribas-Arino<sup>[2]</sup>\**

[1] Departament de Química Inorgànica i Orgànica and Institut de Recerca de Química Teòrica i Computacional, Universitat de Barcelona, Diagonal 645, 08028 Barcelona, Spain

[2] Departament de Ciència de Materials i Química Física and Institut de Recerca de Química Teòrica i Computacional, Universitat de Barcelona, Diagonal 645, 08028 Barcelona, Spain

e-mail: j.ribas@ub.edu

e-mail: jordi.cirera@qi.ub.es

|                                                                                                                                                      |     |
|------------------------------------------------------------------------------------------------------------------------------------------------------|-----|
| $T_{1/2}$ for $[\text{Fe}(\text{L}_1^{\text{R}})(\text{im})_2]^+$ vs. $\sigma_{\text{p}}/\sigma_{\text{m}}$ constant correlation                     | S1  |
| $T_{1/2}$ for the $[\text{Fe}(\text{L}_2^{\text{Rp/Rm}})(\text{im})_2]^+$ vs. $\sigma_{\text{p}}/\sigma_{\text{m}}$ constant correlation             | S2  |
| NBO charges correlations for $[\text{Fe}(\text{L}_1^{\text{R}})(\text{im})_2]^+$ and $[\text{Fe}(\text{L}_2^{\text{Rp/Rm}})(\text{im})_2]^+$ systems | S3  |
| Mulliken charges correlations for $[\text{Fe}(\text{L}_1^{\text{R}})(\text{im})_2]^+$ and $[\text{Fe}(\text{L}_2^{\text{Rp/Rm}})(\text{im})_2]^+$    | S4  |
| NBO charges correlations for $(\text{L}_1^{\text{R}})$ and $(\text{L}_2^{\text{Rp/Rm}})$                                                             | S5  |
| HOMO energy vs. $T_{1/2}$ correlations                                                                                                               | S6  |
| $T_{1/2}$ for the $[\text{Fe}(\text{L}_1^{\text{R}})(\text{im})_2]^+$ vs. electronegativity correlation                                              | S7  |
| $T_{1/2}$ for the $[\text{Fe}(\text{L}_2^{\text{Rp/Rm}})(\text{im})_2]^+$ vs. electronegativity correlation                                          | S8  |
| Cartesian geometries for the B3LYP* optimized geometries                                                                                             | S9  |
| Available experimental data                                                                                                                          | S10 |

S1.  $T_{1/2}$  for  $[\text{Fe}(\text{L}_1^{\text{R}})(\text{im})_2]^+$  vs.  $\sigma_{\text{p}}/\sigma_{\text{m}}$  constant correlation

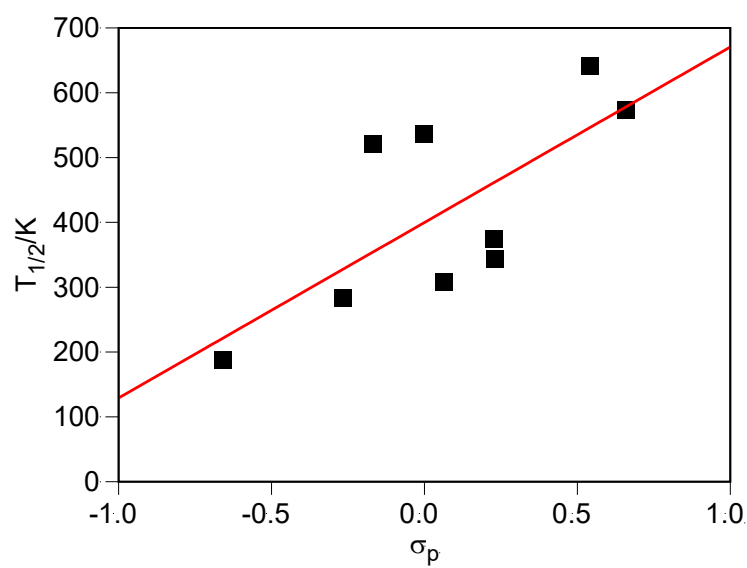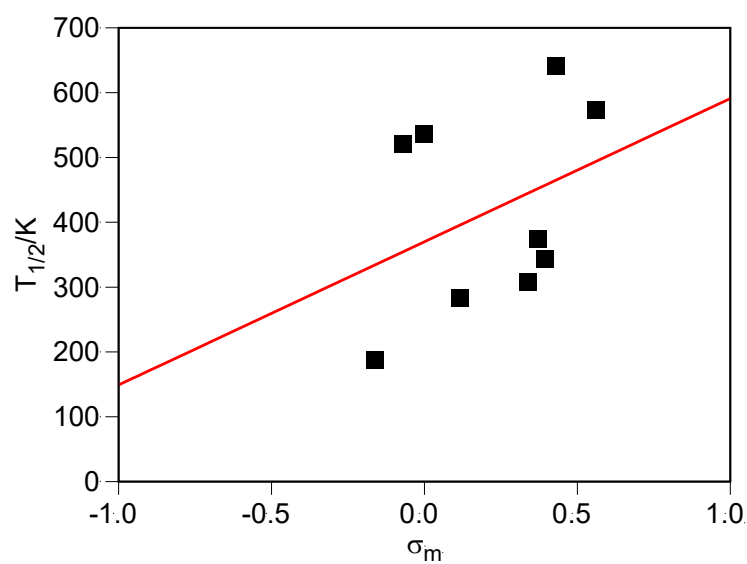

Top, scatterplot between the computed  $T_{1/2}$  and the Hammett  $\sigma_{\text{p}}$  constant ( $R^2 = 0.51$ )

Bottom, scatterplot between the computed  $T_{1/2}$  and the Hammett  $\sigma_{\text{m}}$  constant ( $R^2 = 0.13$ )

S2:  $T_{1/2}$  for the  $[\text{Fe}(\text{L}_2^{\text{Rp/Rm}})(\text{im})_2]^+$  vs.  $\sigma_{\text{p}}/\sigma_{\text{m}}$  constant correlation

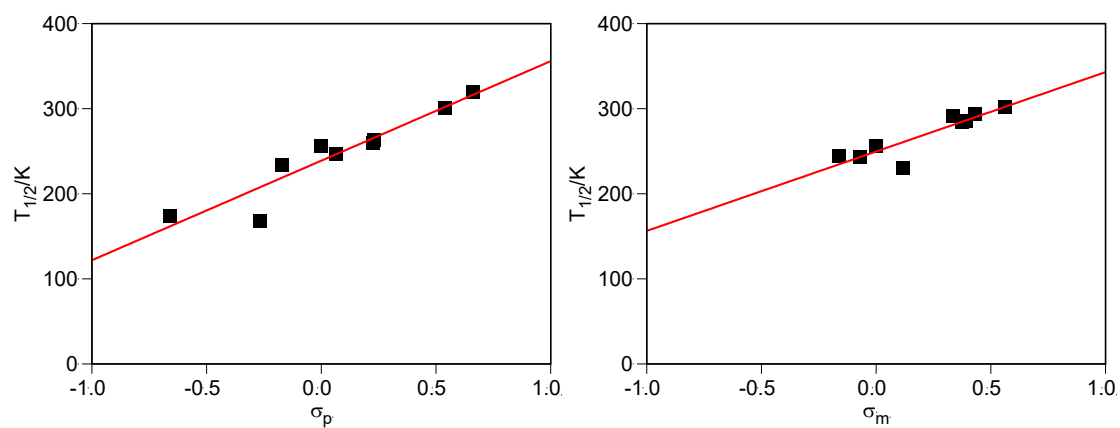

Left, correlation between the computed  $T_{1/2}$  and the  $\sigma_{\text{p}}$  Hammett constant ( $R^2 = 0.88$ ), and right, correlation between the computed  $T_{1/2}$  and the  $\sigma_{\text{m}}$  Hammett constant ( $R^2 = 0.79$ ).

S3. NBO charges correlations for  $[\text{Fe}(\text{L}_1^{\text{R}})(\text{im})_2]^+$  and  $[\text{Fe}(\text{L}_2^{\text{Rp/Rm}})(\text{im})_2]^+$  systems. The following plots provide with correlations of the average NBO charge on donor oxygen atoms,  $q\text{O}(\text{NBO})$ , or on donor nitrogen atoms,  $q\text{N}(\text{NBO})$ , against  $T_{1/2}$ . The charges of both the high-spin (HS) and low-spin (LS) states are considered.

$[\text{Fe}(\text{L}_1^{\text{R}})(\text{im})_2]^+$  vs  $T_{1/2}$

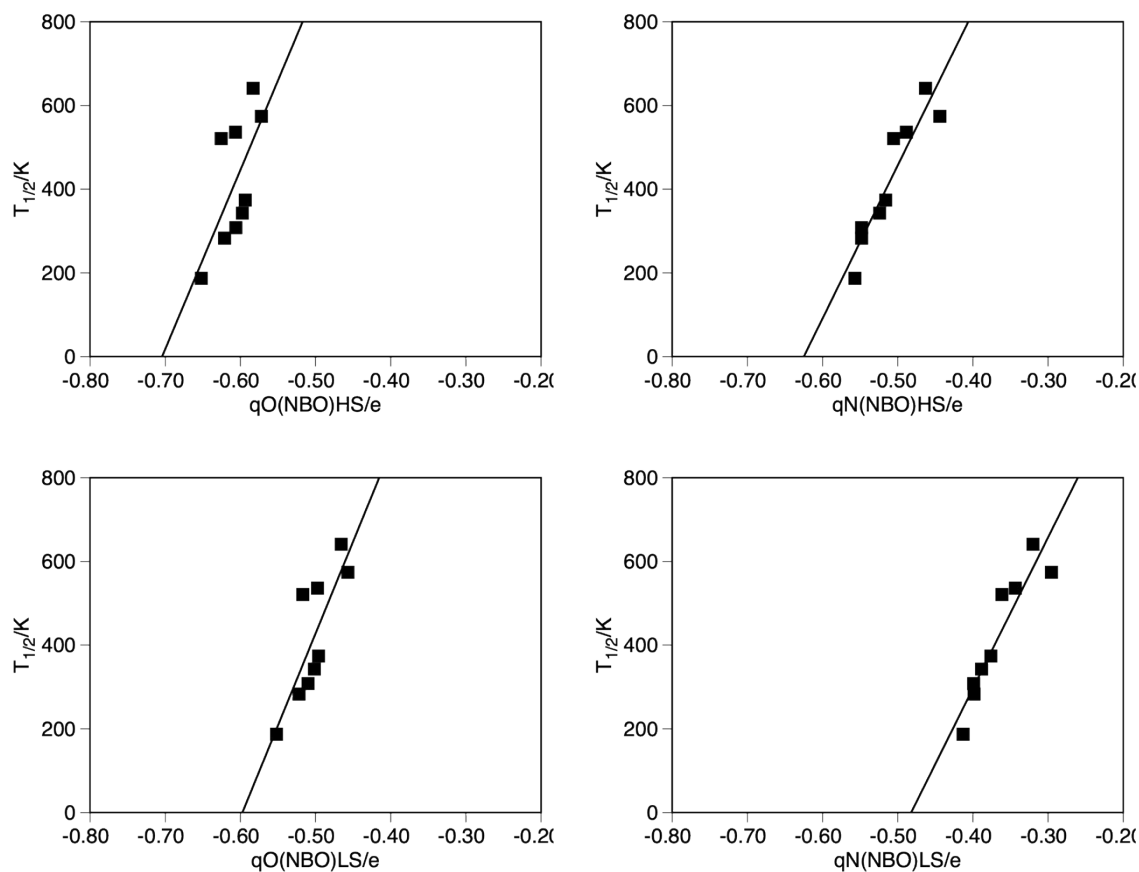

Left-Right, Top-Bottom correlation coefficients:  $R^2 = 0.44$ ,  $R^2 = 0.87$ ,  $R^2 = 0.67$  and  $R^2 = 0.86$

$[\text{Fe}(\text{L}_2^{\text{Rm}})(\text{im})_2]^+$  vs  $T_{1/2}$

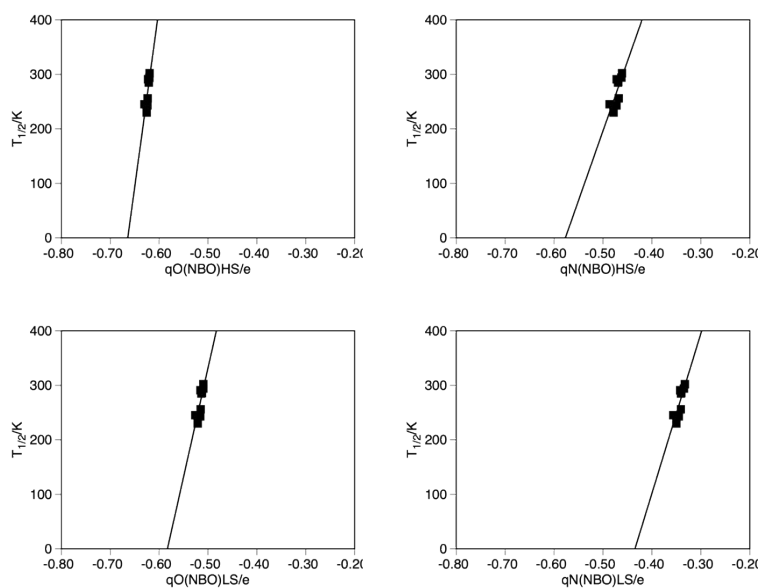

Left-Right, Top-Bottom correlation coefficients:  $R^2 = 0.65$ ,  $R^2 = 0.65$ ,  $R^2 = 0.64$  and  $R^2 = 0.66$

$[\text{Fe}(\text{L}_2^{\text{Rp}})(\text{im})_2]^+$  vs  $T_{1/2}$

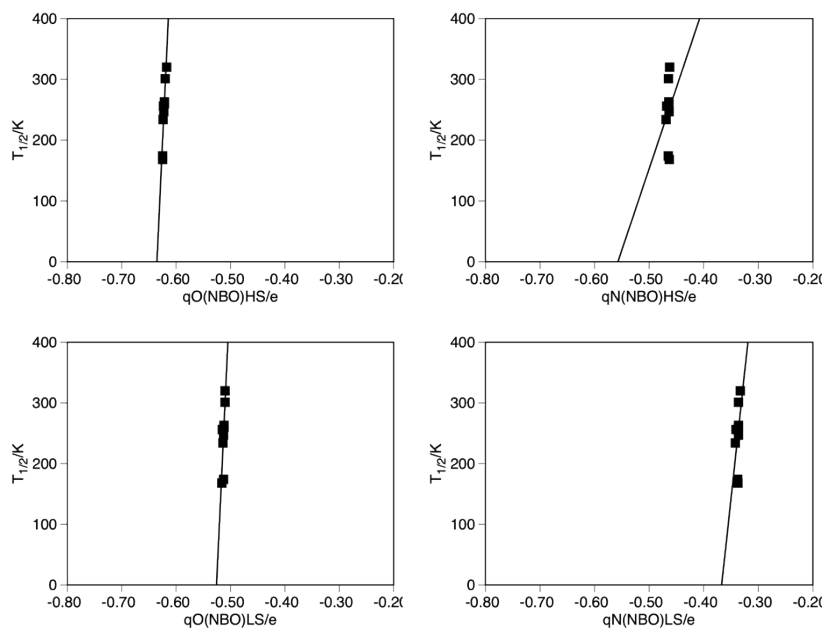

Left-Right, Top-Bottom correlation coefficients:  $R^2 = 0.85$ ,  $R^2 = 0.85$ ,  $R^2 = 0.60$  and  $R^2 = 0.19$ .

S4 Mulliken charges correlations for  $[\text{Fe}(\text{L}_1^{\text{R}})(\text{im})_2]^+$  and  $[\text{Fe}(\text{L}_2^{\text{Rp/Rm}})(\text{im})_2]^+$ . Blue for low-spin ( $S=1/2$ ) and red for high-spin ( $S=5/2$ )

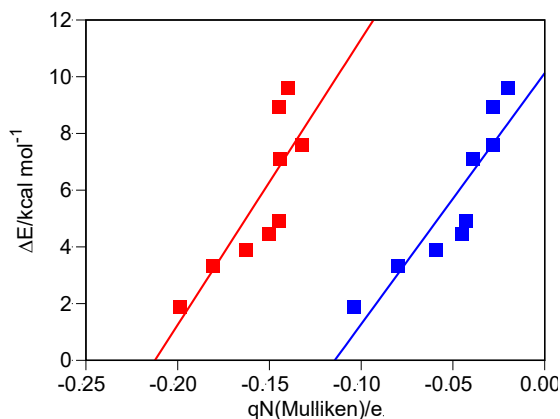

Correlation between the average N Mulliken charge and the spin-state energy gap for the  $[\text{Fe}(\text{L}_1^{\text{R}})(\text{im})_2]^+$  systems. ( $R^2 = 0.67$  and  $0.82$  for high- and low-spin states respectively)

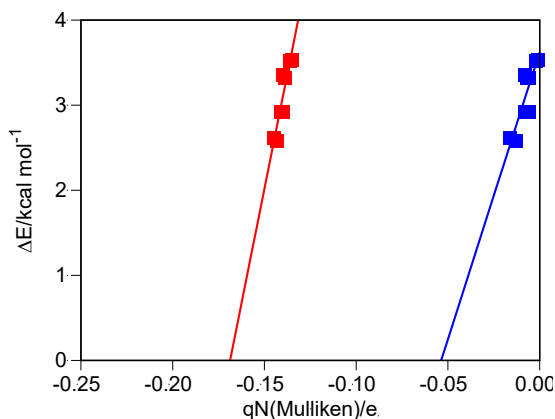

Correlation between the average N Mulliken charge and the spin-state energy gap for the  $[\text{Fe}(\text{L}_2^{\text{Rm}})(\text{im})_2]^+$  systems. ( $R^2 = 0.82$  and  $0.76$  for high- and low-spin states respectively)

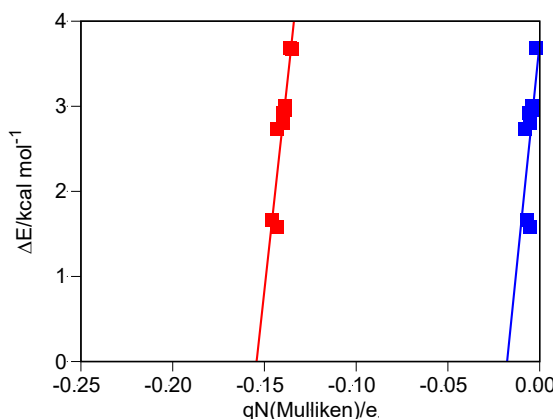

Correlation between the average N Mulliken charge and the spin-state energy gap for the  $[\text{Fe}(\text{L}_2^{\text{Rp}})(\text{im})_2]^+$  systems. ( $R^2 = 0.86$  and  $0.48$  for high- and low-spin states respectively)

S5 NBO charges correlations for ( $L_1^R$ ) and ( $L_2^{Rp/Rm}$ ). Circle for the average NBO charge of the N-donor atoms, and squares for the average O-donor atom.

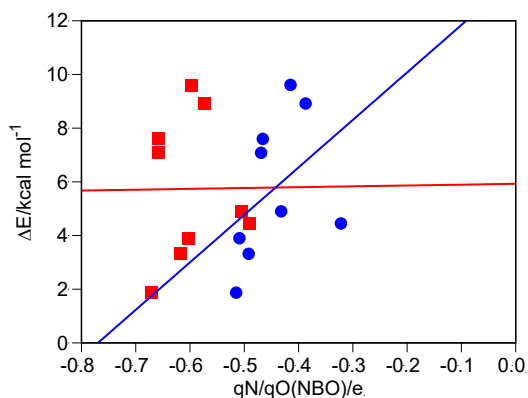

Correlation between the average N (circle) or O (squares) NBO charge of the free  $L_1^R$  ligand and the spin-state energy gap for the  $[Fe(L_1^R)(im)_2]^+$  systems. ( $R^2 = 0.00$  and  $0.17$  for oxygen and nitrogen respectively)

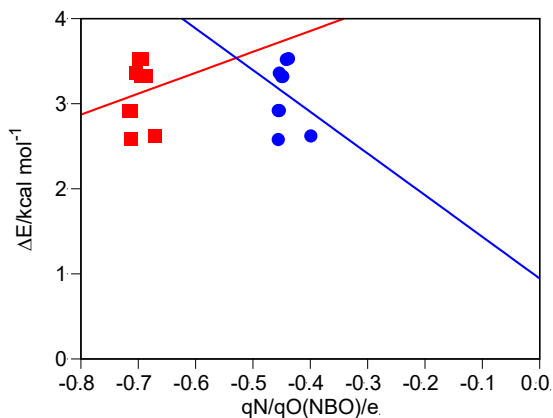

Correlation between the average N (circle) or O (squares) NBO charge of the free  $L_2^{Rm}$  ligand and the spin-state energy gap for the  $[Fe(L_2^{Rm})(im)_2]^+$  systems. ( $R^2 = 0.01$  and  $0.05$  for oxygen and nitrogen respectively)

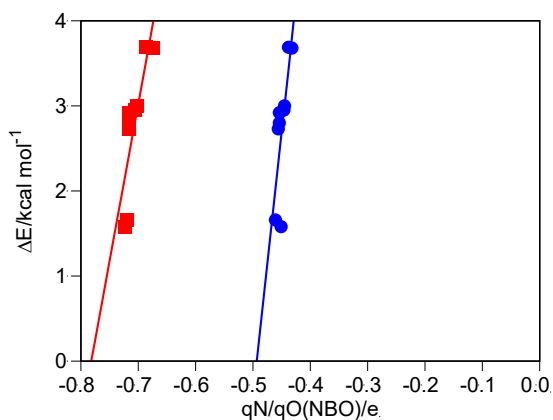

Correlation between the average N (circle) or O (squares) NBO charge of the free  $L_2^{Rp}$  ligand and the spin-state energy gap for the  $[Fe(L_2^{Rp})(im)_2]^+$  systems. ( $R^2 = 0.67$  and  $0.58$  for oxygen and nitrogen respectively)

S6 HOMO energy vs.  $T_{1/2}$  correlations. Red for high-spin, Blue for low-spin and black for the ligand. For the high-spin and low-spin situation, both alpha (circle) and beta (squares) HOMO energies have been used.

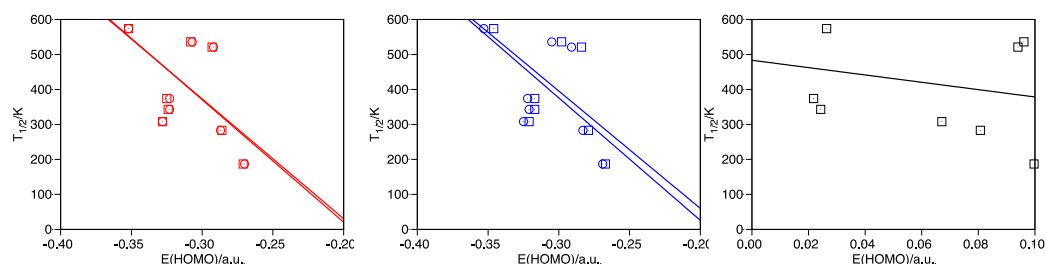

Energy of the HOMO vs the computed  $T_{1/2}$  for the  $[\text{Fe}(\text{L}_1^{\text{R}})(\text{im})_2]^+$  systems.  $R^2$  values are 0.38 and 0.43 (high-spin alpha and beta), 0.39 and 0.45 (low-spin alpha and beta), and 0.07 (free ligand)

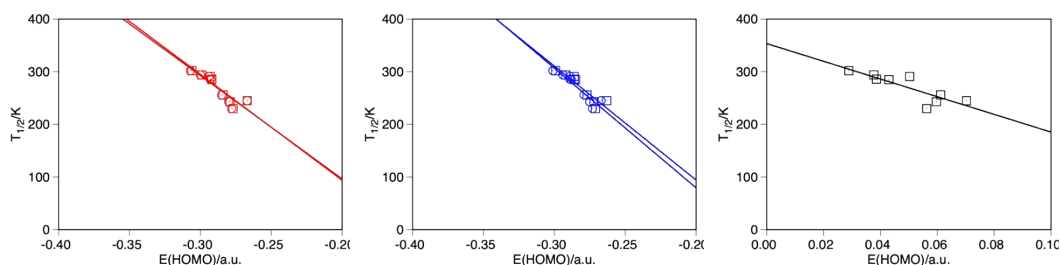

Energy of the HOMO vs the computed  $T_{1/2}$  for the  $[\text{Fe}(\text{L}_2^{\text{Rm}})(\text{im})_2]^+$  systems.  $R^2$  values are 0.89 and 0.89 (high-spin alpha and beta), 0.91 and 0.92 (low-spin alpha and beta), and 0.78 (free ligand)

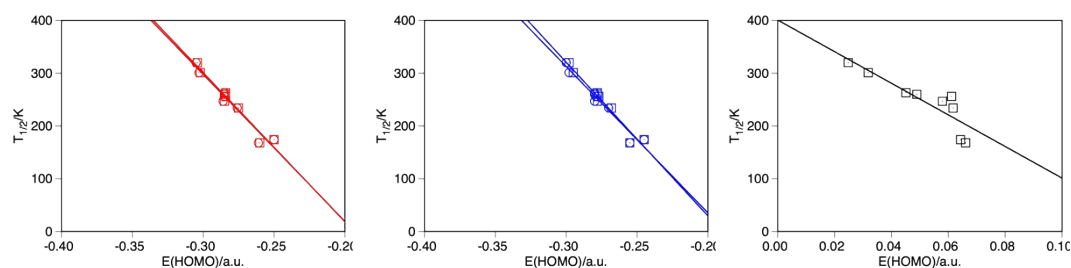

Energy of the HOMO vs the computed  $T_{1/2}$  for the  $[\text{Fe}(\text{L}_2^{\text{Rp}})(\text{im})_2]^+$  systems.  $R^2$  values are 0.95 and 0.95 (high-spin alpha and beta), 0.95 and 0.95 (low-spin alpha and beta), and 0.71 (free ligand)



S7.  $T_{1/2}$  for the  $[\text{Fe}(\text{L}_1^{\text{R}})(\text{im})_2]^+$  vs. electronegativity correlation

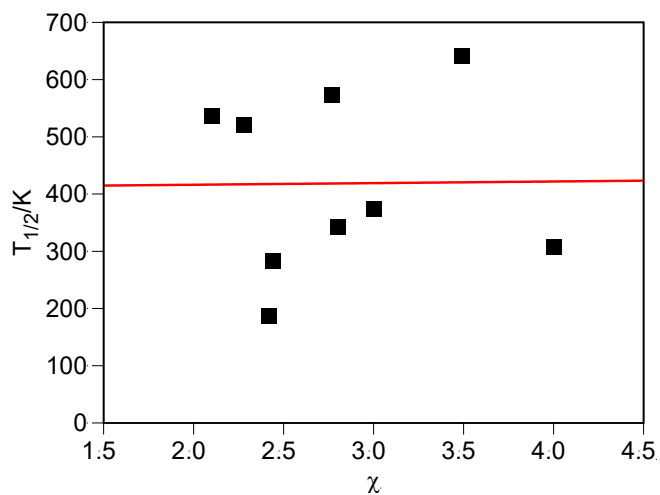

Scatterplot of the substituent electronegativity<sup>1</sup> and the computed  $T_{1/2}$  for  $[\text{Fe}(\text{L}_1^{\text{R}})(\text{im})_2]^+$  ( $R^2 = 0.00$ )

S8.  $T_{1/2}$  for the  $[\text{Fe}(\text{L}_2^{\text{Rp/Rm}})(\text{im})_2]^+$  vs. electronegativity correlation

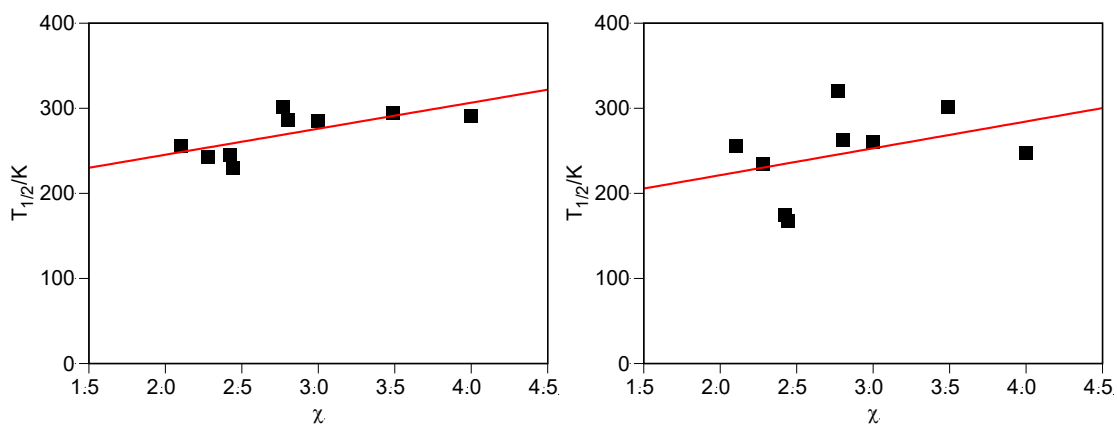

Scatterplot of the substituent electronegativity<sup>1</sup> and the computed  $T_{1/2}$  for  $[\text{Fe}(\text{L}_2^{\text{Rm}})(\text{im})_2]^+$  (left,  $R^2 = 0.49$ ) and  $[\text{Fe}(\text{L}_2^{\text{Rp}})(\text{im})_2]^+$  (right,  $R^2 = 0.14$ ) and

S9 A data set collection of computational results is available in the ioChem-BD repository<sup>2</sup> and can be accessed via <https://doi.org/10.19061/iochem-bd-6-197>

S10 Available experimental data

Experimental data for the  $[\text{Fe}(\text{L}_1^{\text{R}})(\text{im})_2]^+$  systems

| <i>Substituent</i>           | <i>Counterion</i>                | $T_{1/2}$ (K) | <i>Reference</i> |
|------------------------------|----------------------------------|---------------|------------------|
| CH <sub>3</sub> <sup>a</sup> | [BPh <sub>4</sub> ] <sup>-</sup> | LS at all T   | 3                |

<sup>a</sup> In addition to ESR data in powder samples, ESR measurements in DMSO frozen solutions show that the compound is LS at 298 K, which is consistent with our predicted  $T_{1/2}$  value of 521 K (see Table 1 in the main text).

Experimental data for the  $[\text{Fe}(\text{L}_2^{\text{Rp/Rm}})(\text{im})_2]^+$  systems

| <i>Substituent</i>               | <i>Counterion</i>                            | $T_{1/2}$ (K)                           | <i>Reference</i> |
|----------------------------------|----------------------------------------------|-----------------------------------------|------------------|
| H                                | PF <sub>6</sub> <sup>-</sup>                 | 78                                      | 4                |
| H                                | CF <sub>3</sub> SO <sub>3</sub> <sup>-</sup> | Gradual transition. $T_{1/2}$ not given | 4                |
| H                                | BPh <sub>4</sub> <sup>-</sup>                | Gradual transition. $T_{1/2}$ not given | 4                |
| H                                | ClO <sub>4</sub> <sup>-</sup>                | HS at all T                             | 4                |
| H                                | BF <sub>4</sub> <sup>-</sup>                 | HS at all T                             | 4                |
| H                                | AsF <sub>6</sub> <sup>-</sup>                | 69.4 - 74.0                             | 5                |
| H                                | SbF <sub>6</sub> <sup>-</sup>                | 105                                     | 6                |
| OMe ( <i>meta</i> ) <sup>b</sup> | PF <sub>6</sub> <sup>-</sup>                 | ~ 150                                   | 7                |
| OMe ( <i>para</i> ) <sup>b</sup> | PF <sub>6</sub> <sup>-</sup>                 | ~ 150                                   | 7                |
| OMe ( <i>meta</i> )              | CF <sub>3</sub> SO <sub>3</sub> <sup>-</sup> | 192-193                                 | 8                |

<sup>b</sup> Ethanolic solutions of these compounds feature thermochromism when going from liquid nitrogen temperature to room temperature, which is in line with our predicted  $T_{1/2}$  values of 230 K (*meta*, Table 2 in the main text) and 168 K (*para*, Table 3 in the main text).

## References:

- 1 S. G. Bratsch, *J. Chem. Educ.*, 1985, **62**, 101.
- 2 M. Álvarez-Moreno, C. de Graaf, N. López, F. Maseras, J. M. Poblet and C. Bo, *J. Chem. Inf. Model.*, 2015, **55**, 95–103.
- 3 Y. Nishida, S. Oshio and S. Kida, *Inorganica Chim. Acta*, 1977, **23**, 59–61.
- 4 M. Koike, K. Murakami, T. Fujinami, K. Nishi, N. Matsumoto and Y. Sunatsuki, *Inorganica Chim. Acta*, 2013, **399**, 185–192.
- 5 T. Fujinami, M. Koike, N. Matsumoto, Y. Sunatsuki, A. Okazawa and N. Kojima, *Inorg. Chem.*, 2014, **53**, 2254–2259.
- 6 T. Ueno, K. Miyano, D. Hamada, H. Ono, T. Fujinami, N. Matsumoto and Y.

- Sunatsuki, *Magnetochemistry*, 2015, **1**, 72–82.
- 7 T. Fujinami, M. Ikeda, M. Koike, N. Matsumoto, T. Oishi and Y. Sunatsuki, *Inorganica Chim. Acta*, 2015, **432**, 89–95.
- 8 K. Miyano, T. Nishida, H. Ono, D. Hamada, T. Fujinami, N. Matsumoto and Y. Sunatsuki, *Inorganica Chim. Acta*, 2016, **439**, 49–54.
